# Supplementary material
Source: PubMed Central journal article supplement (PMC3859806)
Supplement: NIHMS520322-supplement-1_si_001.pdf [file NIHMS520322-supplement-1_si_001.pdf]

# Amyloid fiber formation in human $\gamma$ D-crystallin induced by UV-B photodamage

Sean D. Moran, Tianqi O. Zhang, Sean M. Decatur, and Martin T. Zanni

## SUPPORTING INFORMATION:

| #  | b         | b++       | b*        | b*++      | b0        | b0++      | Seq. | y         | y++       | y*        | y*++      | y0        | y0++      | #2 |
|----|-----------|-----------|-----------|-----------|-----------|-----------|------|-----------|-----------|-----------|-----------|-----------|-----------|----|
| 1  | 148.0757  | 74.5415   |           |           |           |           | F    |           |           |           |           |           |           | 23 |
| 2  | 262.1186  | 131.5629  | 245.0921  | 123.0497  |           |           | N    | 2635.3151 | 1318.1612 | 2618.2885 | 1309.6479 | 2617.3045 | 1309.1559 | 22 |
| 3  | 391.1612  | 196.0842  | 374.1347  | 187.5710  | 373.1506  | 187.0790  | E    | 2521.2722 | 1261.1397 | 2504.2456 | 1252.6264 | 2503.2616 | 1252.1344 | 21 |
| 4  | 504.2453  | 252.6263  | 487.2187  | 244.1130  | 486.2347  | 243.6210  | I    | 2392.2296 | 1196.6184 | 2375.2030 | 1188.1051 | 2374.2190 | 1187.6131 | 20 |
| 5  | 641.3042  | 321.1557  | 624.2776  | 312.6425  | 623.2936  | 312.1504  | H    | 2279.1455 | 1140.0764 | 2262.1190 | 1131.5631 | 2261.1349 | 1131.0711 | 19 |
| 6  | 728.3362  | 364.6717  | 711.3097  | 356.1585  | 710.3256  | 355.6665  | S    | 2142.0866 | 1071.5469 | 2125.0600 | 1063.0337 | 2124.0760 | 1062.5417 | 18 |
| 7  | 841.4203  | 421.2138  | 824.3937  | 412.7005  | 823.4097  | 412.2085  | L    | 2055.0546 | 1028.0309 | 2038.0280 | 1019.5176 | 2037.0440 | 1019.0256 | 17 |
| 8  | 955.4632  | 478.2352  | 938.4367  | 469.7220  | 937.4526  | 469.2300  | N    | 1941.9705 | 971.4889  | 1924.9440 | 962.9756  | 1923.9599 | 962.4836  | 16 |
| 9  | 1054.5316 | 527.7694  | 1037.5051 | 519.2562  | 1036.5211 | 518.7642  | V    | 1827.9276 | 914.4674  | 1810.9010 | 905.9542  | 1809.9170 | 905.4621  | 15 |
| 10 | 1167.6157 | 584.3115  | 1150.5891 | 575.7982  | 1149.6051 | 575.3062  | L    | 1728.8592 | 864.9332  | 1711.8326 | 856.4199  | 1710.8486 | 855.9279  | 14 |
| 11 | 1296.6583 | 648.8328  | 1279.6317 | 640.3195  | 1278.6477 | 639.8275  | E    | 1615.7751 | 808.3912  | 1598.7485 | 799.8779  | 1597.7645 | 799.3859  | 13 |
| 12 | 1353.6797 | 677.3435  | 1336.6532 | 668.8302  | 1335.6692 | 668.3382  | G    | 1486.7325 | 743.8699  | 1469.7060 | 735.3566  | 1468.7219 | 734.8646  | 12 |
| 13 | 1440.7118 | 720.8595  | 1423.6852 | 712.3462  | 1422.7012 | 711.8542  | S    | 1429.7110 | 715.3592  | 1412.6845 | 706.8459  | 1411.7005 | 706.3539  | 11 |
| 14 | 1626.7911 | 813.8992  | 1609.7645 | 805.3859  | 1608.7805 | 804.8939  | W    | 1342.6790 | 671.8431  | 1325.6525 | 663.3299  | 1324.6684 | 662.8379  | 10 |
| 15 | 1725.8595 | 863.4334  | 1708.8329 | 854.9201  | 1707.8489 | 854.4281  | V    | 1156.5997 | 578.8035  | 1139.5732 | 570.2902  | 1138.5891 | 569.7982  | 9  |
| 16 | 1838.9436 | 919.9754  | 1821.9170 | 911.4621  | 1820.9330 | 910.9701  | L    | 1057.5313 | 529.2693  | 1040.5047 | 520.7560  | 1039.5207 | 520.2640  | 8  |
| 17 | 2002.0069 | 1001.5071 | 1984.9803 | 992.9938  | 1983.9963 | 992.5018  | Y    | 944.4472  | 472.7272  | 927.4207  | 464.2140  | 926.4367  | 463.7220  | 7  |
| 18 | 2131.0495 | 1066.0284 | 2114.0229 | 1057.5151 | 2113.0389 | 1057.0231 | E    | 781.3839  | 391.1956  | 764.3573  | 382.6823  | 763.3733  | 382.1903  | 6  |
| 19 | 2244.1335 | 1122.5704 | 2227.1070 | 1114.0571 | 2226.1230 | 1113.5651 | L    | 652.3413  | 326.6743  | 635.3148  | 318.1610  | 634.3307  | 317.6690  | 5  |
| 20 | 2331.1656 | 1166.0864 | 2314.1390 | 1157.5731 | 2313.1550 | 1157.0811 | S    | 539.2572  | 270.1323  | 522.2307  | 261.6190  | 521.2467  | 261.1270  | 4  |
| 21 | 2445.2085 | 1223.1079 | 2428.1820 | 1214.5946 | 2427.1979 | 1214.1026 | N    | 452.2252  | 226.6162  | 435.1987  | 218.1030  |           |           | 3  |
| 22 | 2608.2718 | 1304.6396 | 2591.2453 | 1296.1263 | 2590.2613 | 1295.6343 | Y    | 338.1823  | 169.5948  | 321.1557  | 161.0815  |           |           | 2  |
| 23 |           |           |           |           |           |           | R    | 175.1190  | 88.0631   | 158.0924  | 79.5498   |           |           |    |

Table S1. Fragment ions in the CID spectrum of parent peptide FNEIHSLSNVLEGSWVLYELSNYR (2781.39, +2), corresponding to Figure 2A. Assigned fragments used in sequence analysis are shown in red.

| #  | b         | b++       | b*        | b*++      | b0        | b0++      | Seq. | y         | y++       | y*        | y*++      | y0        | y0++      | #2 |
|----|-----------|-----------|-----------|-----------|-----------|-----------|------|-----------|-----------|-----------|-----------|-----------|-----------|----|
| 1  | 148.0757  | 74.5415   |           |           |           |           | F    |           |           |           |           |           |           | 23 |
| 2  | 262.1186  | 131.5629  | 245.0921  | 123.0497  |           |           | N    | 2667.3049 | 1334.1561 | 2650.2784 | 1325.6428 | 2649.2944 | 1325.1508 | 22 |
| 3  | 391.1612  | 196.0842  | 374.1347  | 187.5710  | 373.1506  | 187.0790  | E    | 2553.2620 | 1277.1346 | 2536.2355 | 1268.6214 | 2535.2514 | 1268.1294 | 21 |
| 4  | 504.2453  | 252.6263  | 487.2187  | 244.1130  | 486.2347  | 243.6210  | I    | 2424.2194 | 1212.6133 | 2407.1929 | 1204.1001 | 2406.2088 | 1203.6081 | 20 |
| 5  | 657.2991  | 329.1532  | 640.2726  | 320.6399  | 639.2885  | 320.1479  | H    | 2311.1353 | 1156.0713 | 2294.1088 | 1147.5580 | 2293.1248 | 1147.0660 | 19 |
| 6  | 744.3311  | 372.6692  | 727.3046  | 364.1559  | 726.3206  | 363.6639  | S    | 2158.0815 | 1079.5444 | 2141.0550 | 1071.0311 | 2140.0709 | 1070.5391 | 18 |
| 7  | 857.4152  | 429.2112  | 840.3886  | 420.6980  | 839.4046  | 420.2060  | L    | 2071.0495 | 1036.0284 | 2054.0229 | 1027.5151 | 2053.0389 | 1027.0231 | 17 |
| 8  | 971.4581  | 486.2327  | 954.4316  | 477.7194  | 953.4476  | 477.2274  | N    | 1957.9654 | 979.4863  | 1940.9389 | 970.9731  | 1939.9549 | 970.4811  | 16 |
| 9  | 1070.5265 | 535.7669  | 1053.5000 | 527.2536  | 1052.5160 | 526.7616  | V    | 1843.9225 | 922.4649  | 1826.8959 | 913.9516  | 1825.9119 | 913.4596  | 15 |
| 10 | 1183.6106 | 592.3089  | 1166.5841 | 583.7957  | 1165.6000 | 583.3037  | L    | 1744.8541 | 872.9307  | 1727.8275 | 864.4174  | 1726.8435 | 863.9254  | 14 |
| 11 | 1312.6532 | 656.8302  | 1295.6266 | 648.3170  | 1294.6426 | 647.8250  | E    | 1631.7700 | 816.3886  | 1614.7435 | 807.8754  | 1613.7595 | 807.3834  | 13 |
| 12 | 1369.6747 | 685.3410  | 1352.6481 | 676.8277  | 1351.6641 | 676.3357  | G    | 1502.7274 | 751.8674  | 1485.7009 | 743.3541  | 1484.7169 | 742.8621  | 12 |
| 13 | 1456.7067 | 728.8570  | 1439.6801 | 720.3437  | 1438.6961 | 719.8517  | S    | 1445.7060 | 723.3566  | 1428.6794 | 714.8433  | 1427.6954 | 714.3513  | 11 |
| 14 | 1658.7809 | 829.8941  | 1641.7544 | 821.3808  | 1640.7704 | 820.8888  | W    | 1358.6739 | 679.8406  | 1341.6474 | 671.3273  | 1340.6634 | 670.8353  | 10 |
| 15 | 1757.8493 | 879.4283  | 1740.8228 | 870.9150  | 1739.8388 | 870.4230  | V    | 1156.5997 | 578.8035  | 1139.5732 | 570.2902  | 1138.5891 | 569.7982  | 9  |
| 16 | 1870.9334 | 935.9703  | 1853.9068 | 927.4571  | 1852.9228 | 926.9651  | L    | 1057.5313 | 529.2693  | 1040.5047 | 520.7560  | 1039.5207 | 520.2640  | 8  |
| 17 | 2033.9967 | 1017.5020 | 2016.9702 | 1008.9887 | 2015.9862 | 1008.4967 | Y    | 944.4472  | 472.7272  | 927.4207  | 464.2140  | 926.4367  | 463.7220  | 7  |
| 18 | 2163.0393 | 1082.0233 | 2146.0128 | 1073.5100 | 2145.0288 | 1073.0180 | E    | 781.3839  | 391.1956  | 764.3573  | 382.6823  | 763.3733  | 382.1903  | 6  |
| 19 | 2276.1234 | 1138.5653 | 2259.0968 | 1130.0521 | 2258.1128 | 1129.5600 | L    | 652.3413  | 326.6743  | 635.3148  | 318.1610  | 634.3307  | 317.6690  | 5  |
| 20 | 2363.1554 | 1182.0813 | 2346.1289 | 1173.5681 | 2345.1448 | 1173.0761 | S    | 539.2572  | 270.1323  | 522.2307  | 261.6190  | 521.2467  | 261.1270  | 4  |
| 21 | 2477.1983 | 1239.1028 | 2460.1718 | 1230.5895 | 2459.1878 | 1230.0975 | N    | 452.2252  | 226.6162  | 435.1987  | 218.1030  |           |           | 3  |
| 22 | 2640.2617 | 1320.6345 | 2623.2351 | 1312.1212 | 2622.2511 | 1311.6292 | Y    | 338.1823  | 169.5948  | 321.1557  | 161.0815  |           |           | 2  |
| 23 |           |           |           |           |           |           | R    | 175.1190  | 88.0631   | 158.0924  | 79.5498   |           |           | 1  |

**Table S2. Fragment ions in the CID spectrum of parent peptide FNEIHSLNVLEGSWVLYELSNYR (2813.39, 2 Ox., +3), corresponding to Figure 2B. Assigned fragments used in sequence analysis are shown in red.**

| #  | B         | b++      | b*        | b*++     | b0        | b0++     | Seq. | y         | y++      | y*        | y*++     | y0        | y0++     | #2 |
|----|-----------|----------|-----------|----------|-----------|----------|------|-----------|----------|-----------|----------|-----------|----------|----|
| 1  | 148.0757  | 74.5415  |           |          |           |          | F    |           |          |           |          |           |          | 14 |
| 2  | 262.1186  | 131.5629 | 245.0921  | 123.0497 |           |          | N    | 1497.7332 | 749.3703 | 1480.7067 | 740.8570 | 1479.7227 | 740.3650 | 13 |
| 3  | 391.1612  | 196.0842 | 374.1347  | 187.5710 | 373.1506  | 187.0790 | E    | 1383.6903 | 692.3488 | 1366.6638 | 683.8355 | 1365.6797 | 683.3435 | 12 |
| 4  | 504.2453  | 252.6263 | 487.2187  | 244.1130 | 486.2347  | 243.6210 | I    | 1254.6477 | 627.8275 | 1237.6212 | 619.3142 | 1236.6371 | 618.8222 | 11 |
| 5  | 641.3042  | 321.1557 | 624.2776  | 312.6425 | 623.2936  | 312.1504 | H    | 1141.5636 | 571.2855 | 1124.5371 | 562.7722 | 1123.5531 | 562.2802 | 10 |
| 6  | 728.3362  | 364.6717 | 711.3097  | 356.1585 | 710.3256  | 355.6665 | S    | 1004.5047 | 502.7560 | 987.4782  | 494.2427 | 986.4942  | 493.7507 | 9  |
| 7  | 841.4203  | 421.2138 | 824.3937  | 412.7005 | 823.4097  | 412.2085 | L    | 917.4727  | 459.2400 | 900.4462  | 450.7267 | 899.4621  | 450.2347 | 8  |
| 8  | 955.4632  | 478.2352 | 938.4367  | 469.7220 | 937.4526  | 469.2300 | N    | 804.3886  | 402.6980 | 787.3621  | 394.1847 | 786.3781  | 393.6927 | 7  |
| 9  | 1054.5316 | 527.7694 | 1037.5051 | 519.2562 | 1036.5211 | 518.7642 | V    | 690.3457  | 345.6765 |           |          | 672.3352  | 336.6712 | 6  |
| 10 | 1167.6157 | 584.3115 | 1150.5891 | 575.7982 | 1149.6051 | 575.3062 | L    | 591.2773  | 296.1423 |           |          | 573.2667  | 287.1370 | 5  |
| 11 | 1296.6583 | 648.8328 | 1279.6317 | 640.3195 | 1278.6477 | 639.8275 | E    | 478.1932  | 239.6003 |           |          | 460.1827  | 230.5950 | 4  |
| 12 | 1353.6797 | 677.3435 | 1336.6532 | 668.8302 | 1335.6692 | 668.3382 | G    | 349.1506  | 175.0790 |           |          | 331.1401  | 166.0737 | 3  |
| 13 | 1440.7118 | 720.8595 | 1423.6852 | 712.3462 | 1422.7012 | 711.8542 | S    | 292.1292  | 146.5682 |           |          | 274.1186  | 137.5629 | 2  |
| 14 |           |          |           |          |           |          | W    | 205.0972  | 103.0522 |           |          |           |          | 1  |

**Table S3. Fragment ions in the CID spectrum of parent peptide FNEIHSLNVLEGSW (1643.81, +2), corresponding to Figure 2C. Assigned fragments used in sequence analysis are shown in red.**

| # | b        | b++      | b*       | b*++     | b0       | b0++     | Seq. | y         | y++      | y*        | y*++     | y0        | y0++     | #2 |
|---|----------|----------|----------|----------|----------|----------|------|-----------|----------|-----------|----------|-----------|----------|----|
| 1 | 100.0757 | 50.5415  |          |          |          |          | V    |           |          |           |          |           |          | 9  |
| 2 | 213.1598 | 107.0835 |          |          |          |          | L    | 1057.5313 | 529.2693 | 1040.5047 | 520.7560 | 1039.5207 | 520.2640 | 8  |
| 3 | 376.2231 | 188.6152 |          |          |          |          | Y    | 944.4472  | 472.7272 | 927.4207  | 464.2140 | 926.4367  | 463.7220 | 7  |
| 4 | 505.2657 | 253.1365 |          |          | 487.2551 | 244.1312 | E    | 781.3839  | 391.1956 | 764.3573  | 382.6823 | 763.3733  | 382.1903 | 6  |
| 5 | 618.3497 | 309.6785 |          |          | 600.3392 | 300.6732 | L    | 652.3413  | 326.6743 | 635.3148  | 318.1610 | 634.3307  | 317.6690 | 5  |
| 6 | 705.3818 | 353.1945 |          |          | 687.3712 | 344.1892 | S    | 539.2572  | 270.1323 | 522.2307  | 261.6190 | 521.2467  | 261.1270 | 4  |
| 7 | 819.4247 | 410.2160 | 802.3981 | 401.7027 | 801.4141 | 401.2107 | N    | 452.2252  | 226.6162 | 435.1987  | 218.1030 |           |          | 3  |
| 8 | 982.4880 | 491.7477 | 965.4615 | 483.2344 | 964.4775 | 482.7424 | Y    | 338.1823  | 169.5948 | 321.1557  | 161.0815 |           |          | 2  |
| 9 |          |          |          |          |          |          | R    | 175.1190  | 88.0631  | 158.0924  | 79.5498  |           |          | 1  |

**Table S4. Fragment ions in the CID spectrum of parent peptide VLYELSNYR (1155.60, +2), corresponding to Figure 2D. Assigned fragments used in sequence analysis are shown in red.**

| #  | b         | b++      | b*        | b*++     | b0        | b0++     | Seq. | y         | y++      | y*        | y*++     | y0        | y0++     | #2 |
|----|-----------|----------|-----------|----------|-----------|----------|------|-----------|----------|-----------|----------|-----------|----------|----|
| 1  | 187.0866  | 94.0469  |           |          |           |          | W    |           |          |           |          |           |          | 10 |
| 2  | 286.1559  | 143.5811 |           |          |           |          | V    | 1156.5997 | 578.8035 | 1139.5732 | 570.2902 | 1138.5891 | 569.7982 | 9  |
| 3  | 399.2391  | 200.1232 |           |          |           |          | L    | 1057.5313 | 529.2693 | 1040.5047 | 520.7560 | 1039.5207 | 520.2640 | 8  |
| 4  | 562.3024  | 281.6548 |           |          |           |          | Y    | 944.4472  | 472.7272 | 927.4207  | 464.2140 | 926.4367  | 463.7220 | 7  |
| 5  | 691.3450  | 346.1761 |           |          | 673.3344  | 337.1709 | E    | 781.3839  | 391.1956 | 764.3573  | 382.6823 | 763.3733  | 382.1903 | 6  |
| 6  | 804.4291  | 402.7182 |           |          | 786.4185  | 393.7129 | L    | 652.3413  | 326.6743 | 635.3148  | 318.1610 | 634.3307  | 317.6690 | 5  |
| 7  | 891.4611  | 446.2342 |           |          | 873.4505  | 437.2289 | S    | 539.2572  | 270.1323 | 522.2307  | 261.6190 | 521.2467  | 261.1270 | 4  |
| 8  | 1005.5040 | 503.2556 | 988.4775  | 494.7424 | 987.4934  | 494.2504 | N    | 452.2252  | 226.6162 | 435.1987  | 218.1030 |           |          | 3  |
| 9  | 1168.5673 | 584.7873 | 1151.5408 | 576.2740 | 1150.5568 | 575.7820 | Y    | 338.1823  | 169.5948 | 321.1557  | 161.0815 |           |          | 2  |
| 10 |           |          |           |          |           |          | R    | 175.1190  | 88.0631  | 158.0924  | 79.5498  |           |          | 1  |

**Table S5. Fragment ions in the CID spectrum of parent peptide WVLYELSNYR (1341.68, +2), corresponding to Figure 2E. Assigned fragments used in sequence analysis are shown in red.**

| #  | B         | b++      | b*        | b*++     | b0        | b0++     | Seq. | y         | y++      | y*        | y*++     | y0        | y0++     | #2 |
|----|-----------|----------|-----------|----------|-----------|----------|------|-----------|----------|-----------|----------|-----------|----------|----|
| 1  | 203.0815  | 102.0444 |           |          |           |          | W    |           |          |           |          |           |          | 10 |
| 2  | 302.1499  | 151.5786 |           |          |           |          | V    | 1156.5997 | 578.8035 | 1139.5732 | 570.2902 | 1138.5891 | 569.7982 | 9  |
| 3  | 415.2340  | 208.1206 |           |          |           |          | L    | 1057.5313 | 529.2693 | 1040.5047 | 520.7560 | 1039.5207 | 520.2640 | 8  |
| 4  | 578.2973  | 289.6523 |           |          |           |          | Y    | 944.4472  | 472.7272 | 927.4207  | 464.2140 | 926.4367  | 463.7220 | 7  |
| 5  | 707.3399  | 354.1736 |           |          | 689.3293  | 345.1683 | E    | 781.3839  | 391.1956 | 764.3573  | 382.6823 | 763.3733  | 382.1903 | 6  |
| 6  | 820.4240  | 410.7156 |           |          | 802.4134  | 401.7103 | L    | 652.3413  | 326.6743 | 635.3148  | 318.1610 | 634.3307  | 317.6690 | 5  |
| 7  | 907.4560  | 454.2316 |           |          | 889.4454  | 445.2264 | S    | 539.2572  | 270.1323 | 522.2307  | 261.6190 | 521.2467  | 261.1270 | 4  |
| 8  | 1021.4989 | 511.2531 | 1004.4724 | 502.7398 | 1003.4884 | 502.2478 | N    | 452.2252  | 226.6162 | 435.1987  | 218.1030 |           |          | 3  |
| 9  | 1184.5623 | 592.7848 | 1167.5357 | 584.2715 | 1166.5517 | 583.7795 | Y    | 338.1823  | 169.5948 | 321.1557  | 161.0815 |           |          | 2  |
| 10 |           |          |           |          |           |          | R    | 175.1190  | 88.0631  | 158.0924  | 79.5498  |           |          | 1  |

**Table S6. Fragment ions in the CID spectrum of parent peptide WVLYELSNYR (1357.67, 1 Ox., +2), corresponding to Figure 2E. Assigned fragments used in sequence analysis are shown in red.**
